# Supplementary material
Source: Springer Nature journal article supplement (https://www.springermedizin.de/resource/supplementary/12936_2010_1676_MOESM2_ESM.pdf/9542318)

### *msp2* - Burkina Faso

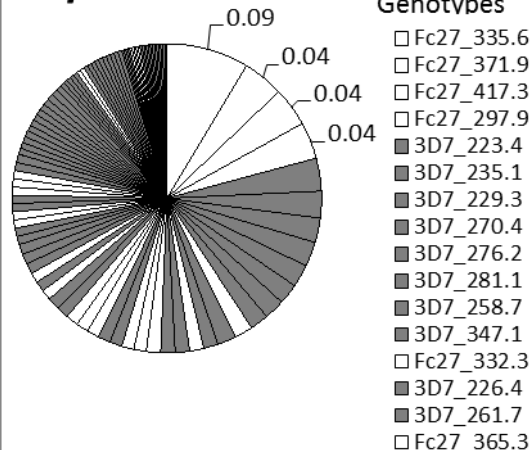

### *msp2* - São Tomé

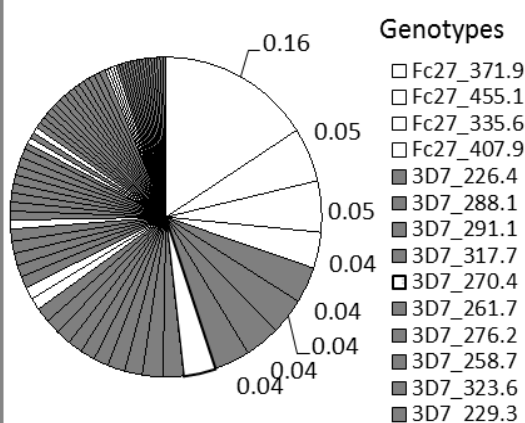

### *msp2* - Malawi

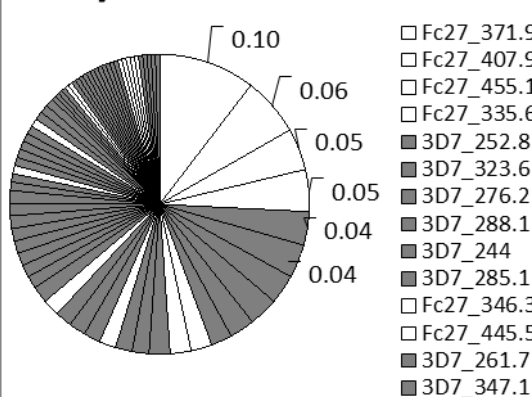

### *msp2* - Tanzania

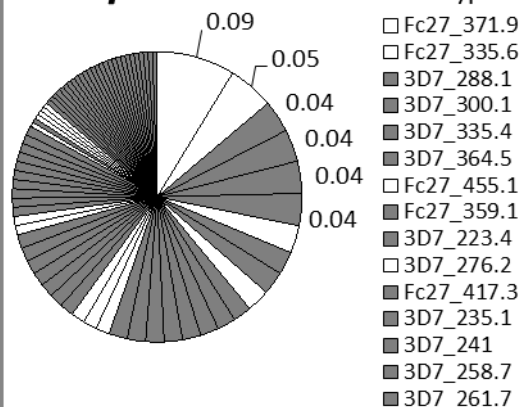

### *msp2* - Uganda

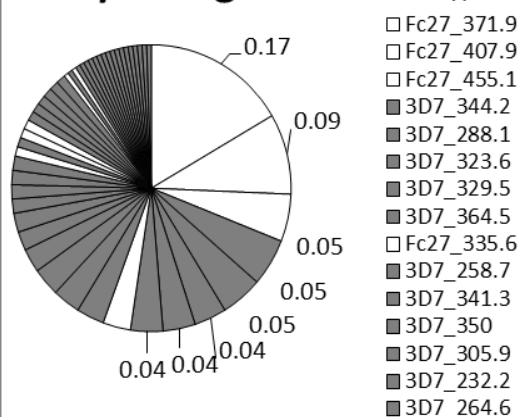

**WHITE= Fc27**  
**GREY = 3D7**

Figure 2

Supplement: MOESM2 [file 9542318]
